# Supplementary material for: Heterometallic platinum(ii) compounds with β-aminoethylferrocenes: synthesis, electrochemical behaviour and anticancer activity
Source: Royal Society of Chemistry journal article supplement (doi:10.1039/c1dt11358e), 2011-10-25
Supplement: c1dt11358e.pdf [file c1dt11358e.pdf]

## Supplementary Information

### Heterometallic platinum(II) compounds with $\beta$ -aminoethylferrocenes: synthesis, electrochemical behaviour and anticancer activity

Daniel Nieto,<sup>a</sup> Ana M<sup>a</sup> González-Vadillo,<sup>\*a</sup> Sonia Bruña,<sup>a</sup> César J. Pastor,<sup>b</sup> Carla Ríos-Luci,<sup>c</sup>  
Leticia G. León,<sup>c</sup> José M. Padrón,<sup>c</sup> Carmen Navarro-Ranninger,<sup>a</sup> and Isabel Cuadrado<sup>\*a</sup>

<sup>a</sup> Departamento de Química Inorgánica, Facultad de Ciencias, <sup>b</sup> Laboratorio de Difracción de Rayos X, Universidad Autónoma de Madrid, Cantoblanco, 29049, Madrid, Spain. E-mail: [isabel.cuadrado@uam.es](mailto:isabel.cuadrado@uam.es)

<sup>c</sup> BioLab, Instituto Universitario de Bio-Organica "Antonio González" (IUBO-AG). Universidad de La Laguna, C/ Astrofísico Francisco Sánchez 2, 38206, La Laguna, Spain.

|                                                                                                |    |
|------------------------------------------------------------------------------------------------|----|
| <b>1. Structural Characterization of Compounds 1 and 2</b>                                     | 2  |
| Figures S1 and S2: <sup>1</sup> H NMR and <sup>13</sup> C NMR spectra of <b>1</b>              | 2  |
| Figure S3: HMQC and HMBC NMR spectra of <b>1</b>                                               | 3  |
| Figures S4 and S5: <sup>1</sup> H NMR and <sup>13</sup> C NMR spectra of <b>2</b>              | 4  |
| Figure S6: HMQC and HMBC NMR spectra of <b>2</b>                                               | 5  |
| <b>2. Structural Characterization of Compounds 3–6</b>                                         | 6  |
| Figure S7: IR spectrum of compound <b>3</b>                                                    | 6  |
| Figure S8: Mass spectrometry characterization by ESI for compound <b>3</b>                     | 6  |
| Figures S9 and S10: <sup>1</sup> H NMR and <sup>13</sup> C NMR spectra of <b>4</b>             | 7  |
| Figures S11, S12 and S13: <sup>195</sup> Pt NMR, IR and mass spectra of compound <b>4</b>      | 8  |
| Figures S14 and S15: <sup>1</sup> H NMR and <sup>13</sup> C NMR spectra of <b>5</b>            | 9  |
| Figures S16, S17 and S18: <sup>195</sup> Pt NMR, IR and mass spectra of compound <b>5</b>      | 10 |
| Figures S19 and S20: <sup>1</sup> H NMR and <sup>13</sup> C NMR spectra of <b>6</b>            | 11 |
| Figures S21, S22 and S23: <sup>195</sup> Pt NMR, IR and mass spectra of compound <b>6</b>      | 12 |
| <b>3. Electrochemistry of Compounds 3-6</b>                                                    | 13 |
| Figure S24: SWV of <b>3</b> in dmsO                                                            | 13 |
| Figure S25: CVs of <b>4</b> in dmsO at different scan rates and SWV                            | 13 |
| Figure S26: CVs of <b>5</b> in dmsO at different scan rates and SWV                            | 14 |
| Figure S27: CVs of <b>6</b> in dmsO at different scan rates and SWV                            | 15 |
| Figure S28: CVs of <b>6</b> in CH <sub>2</sub> Cl <sub>2</sub> at different scan rates and SWV | 16 |

## 1.- Structural Characterization of Compounds 1 and 2

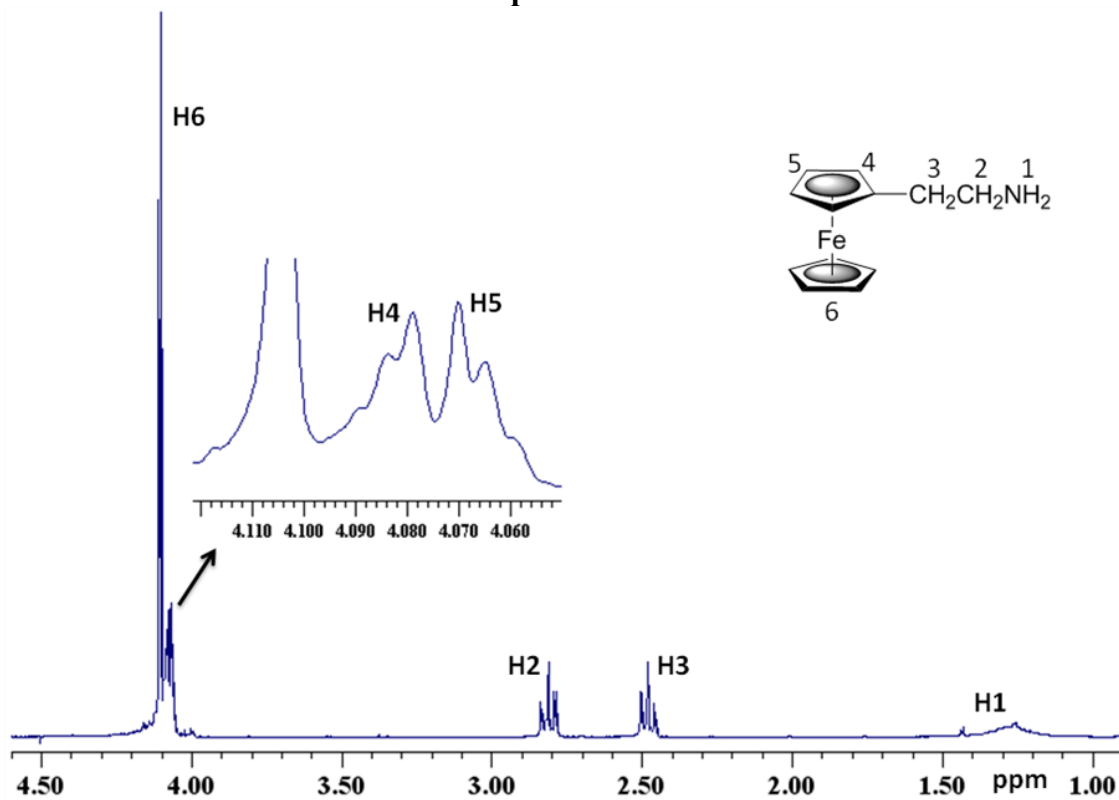

Figure S1.  $^1\text{H}$  NMR spectrum (in  $\text{CDCl}_3$ , 300 MHz) of compound 1 (inset: expanded view of cyclopentadienyl regions).

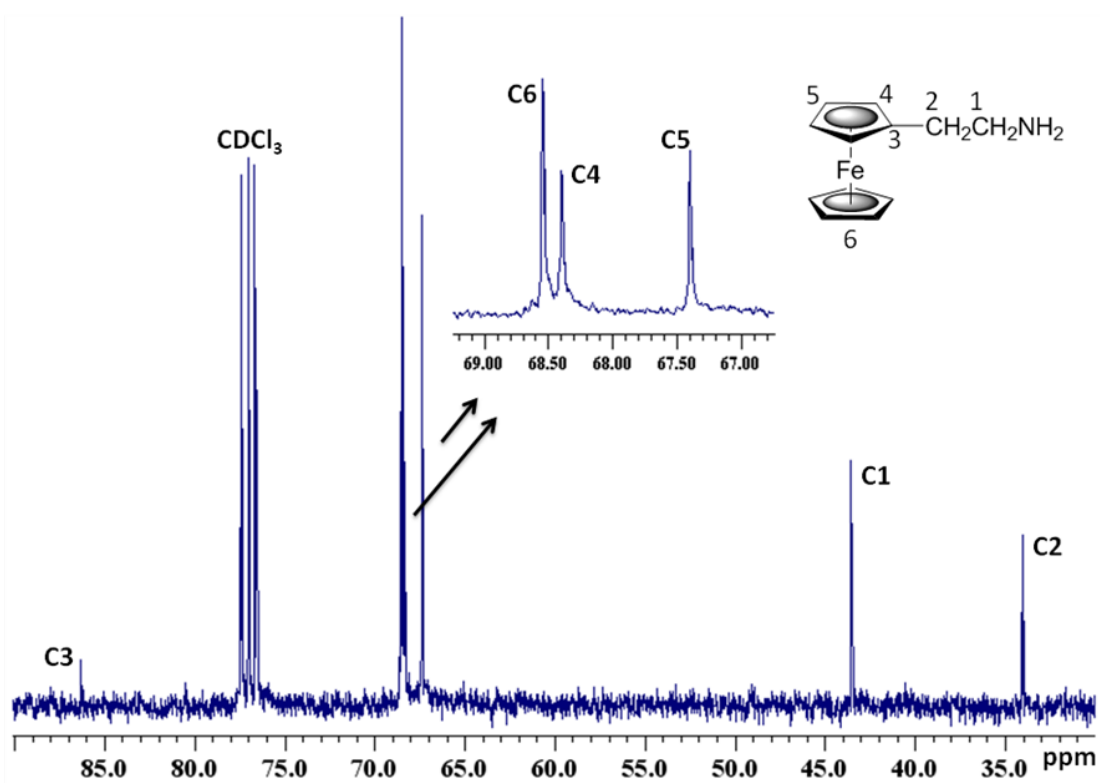

Figure S2.  $^{13}\text{C}$  NMR spectrum (in  $\text{CDCl}_3$ , 75 MHz) of compound 1 (inset: expanded view of cyclopentadienyl regions).

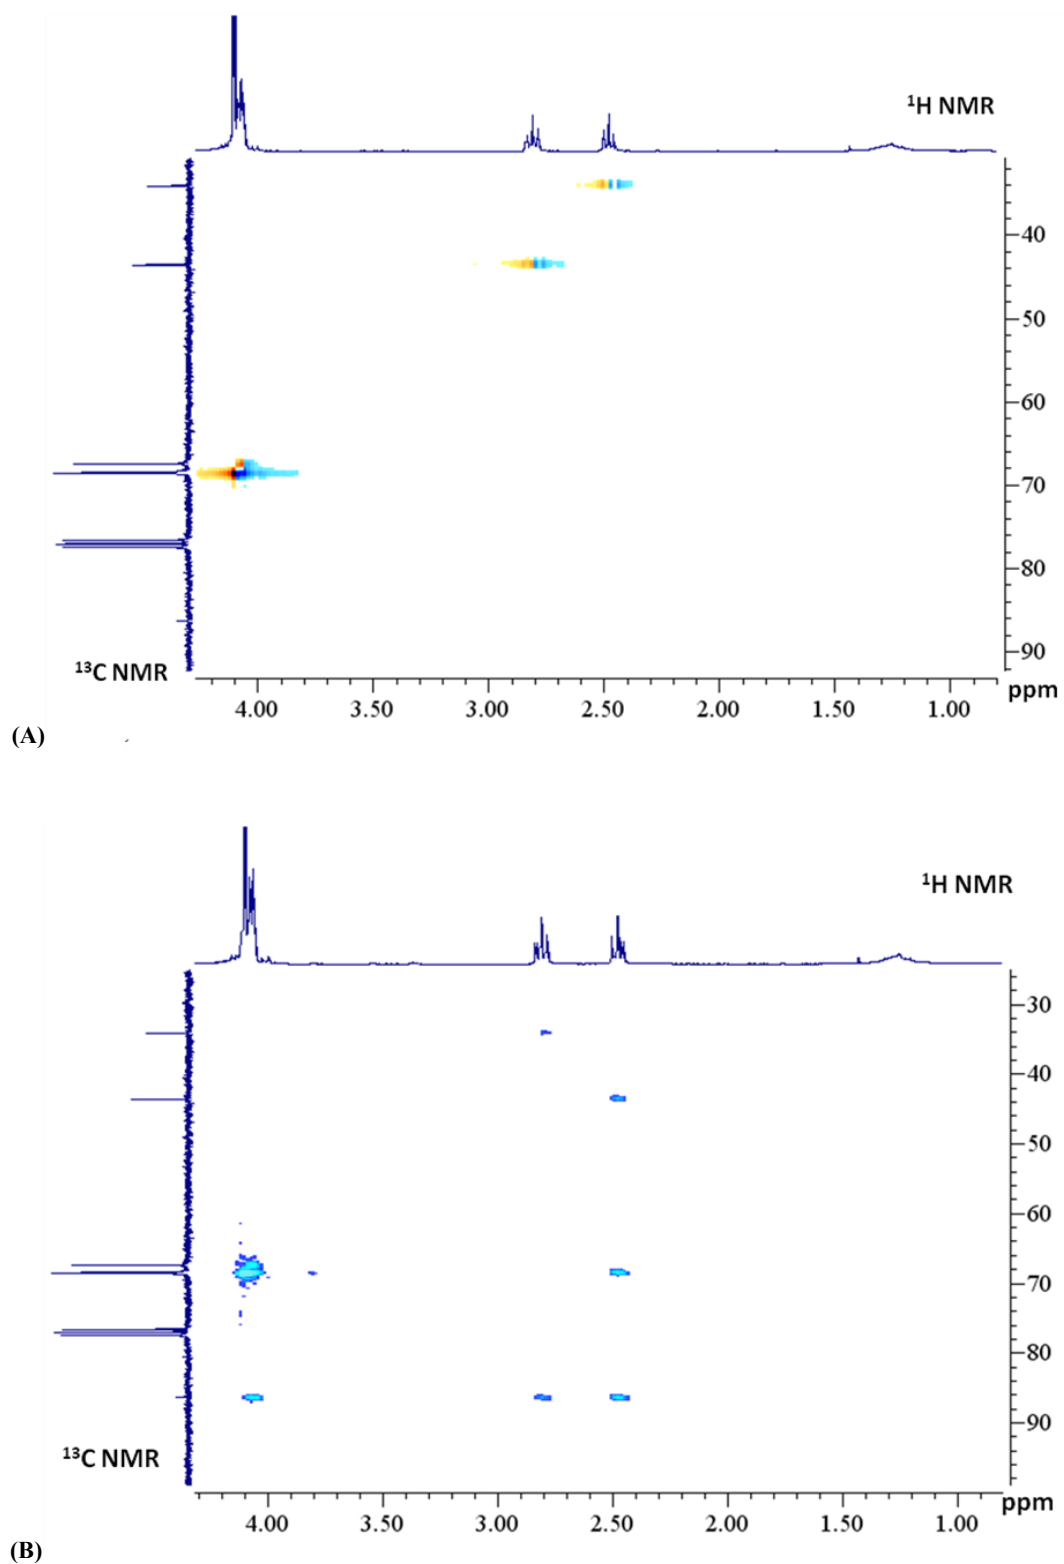

**Figure S3.** HMQC NMR spectrum (A) and HMBC NMR spectrum (B) (in  $\text{CDCl}_3$ , 300 MHz) of **1**.

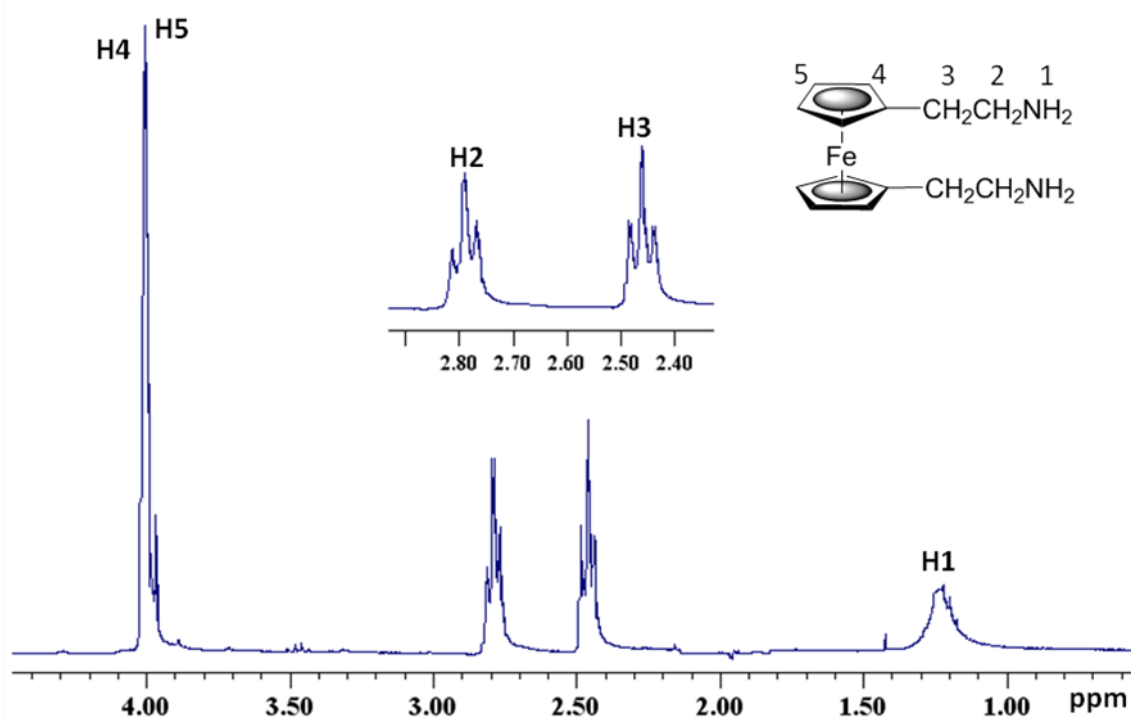

**Figure S4.** <sup>1</sup>H NMR spectrum (in CDCl<sub>3</sub>, 300 MHz) of compound **2** (inset: expanded view of CH<sub>2</sub> regions).

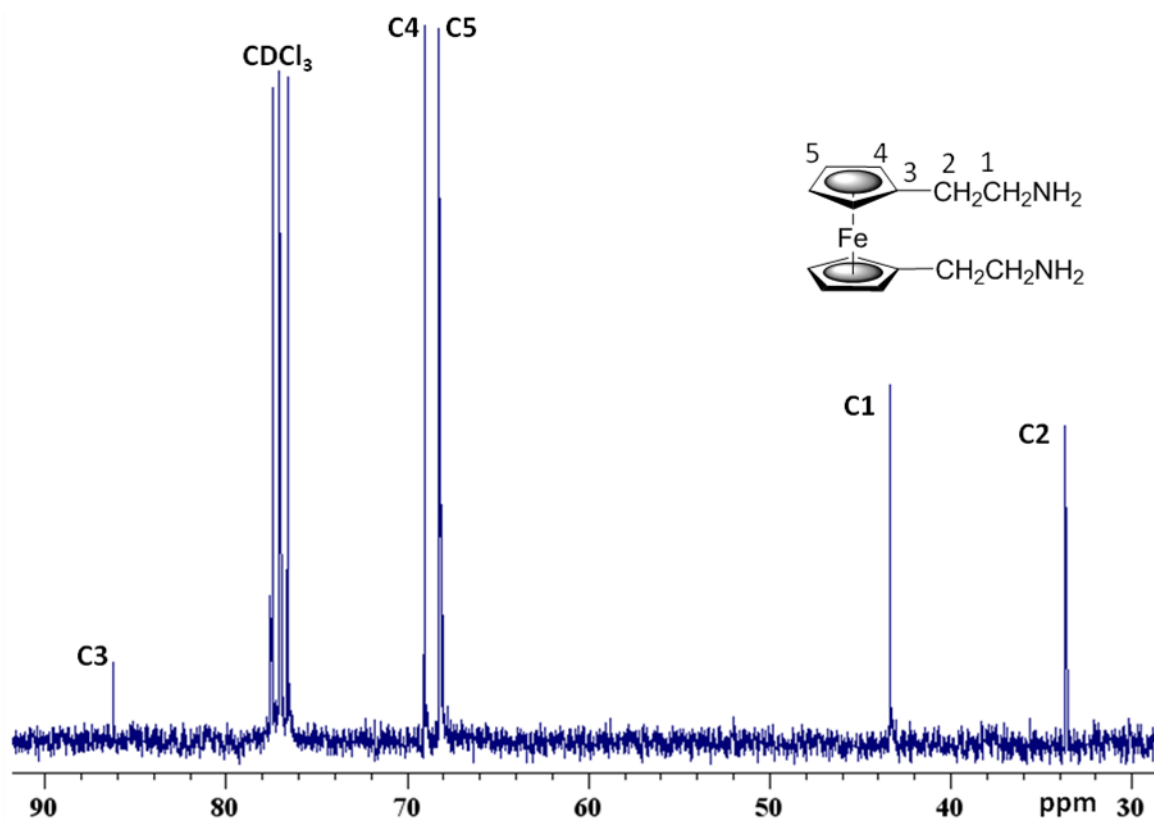

**Figure S5.** <sup>13</sup>C NMR spectrum (in CDCl<sub>3</sub>, 75 MHz) of compound **2**.

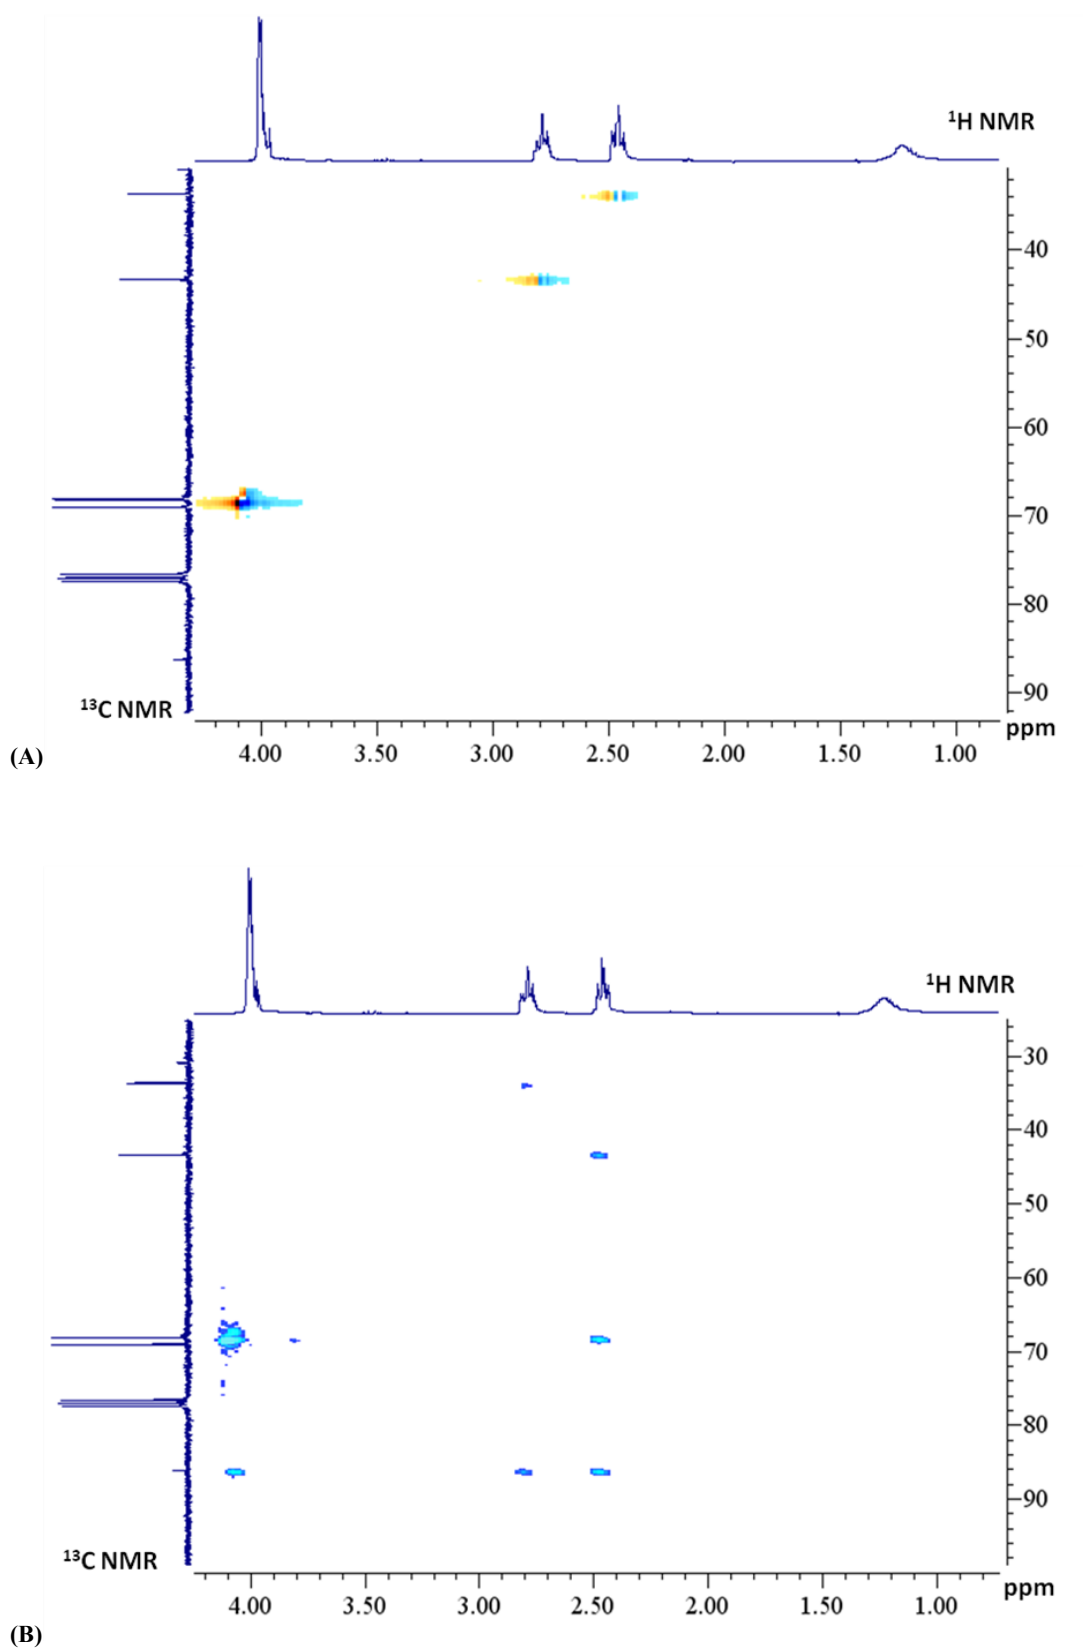

Figure S6. HMQC NMR spectrum (A) and HMBC NMR spectrum (B) (in CDCl<sub>3</sub>, 300 MHz) of 2.

## 2.- Structural Characterization of Compounds 3 – 6

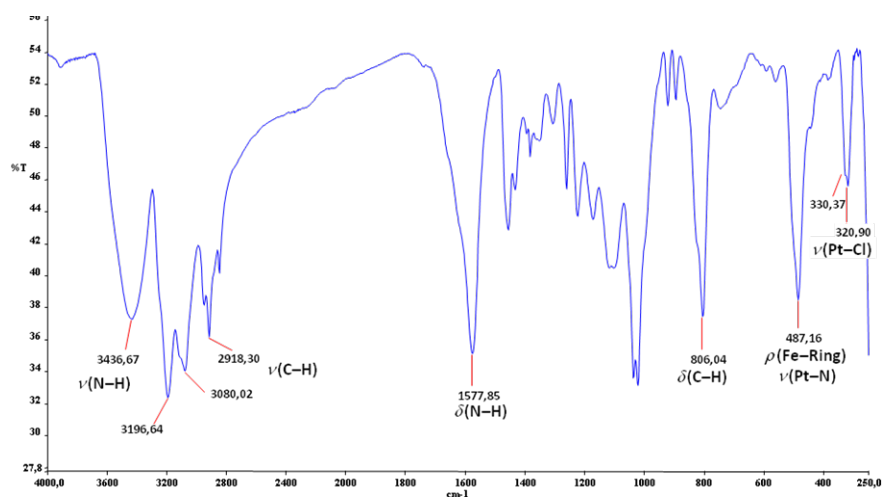

Figure S7. IR spectrum (in KBr) of compound 3.

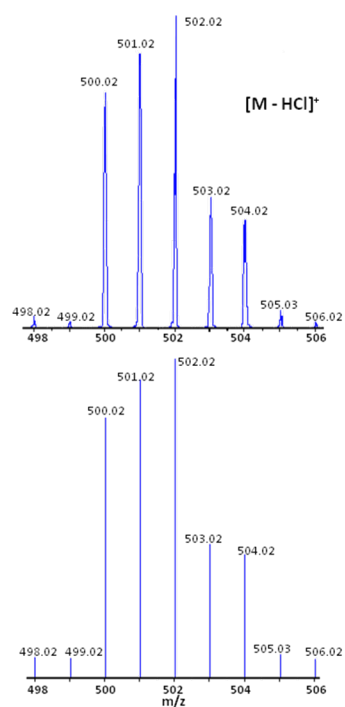

Figure S8. Mass spectrometry characterization by ESI for compound 3. Isotopic distribution of molecular ion pick of 3, experimental (top) and calculated (bottom).

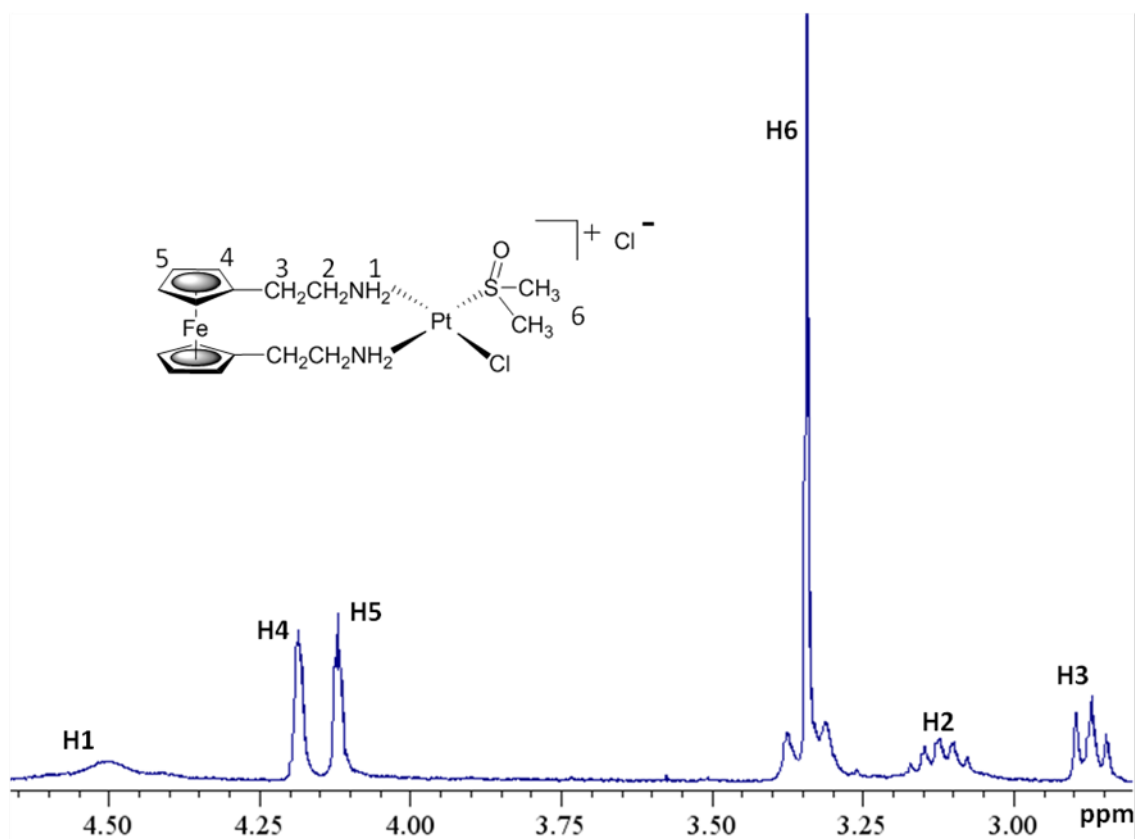

Figure S9. <sup>1</sup>H NMR spectrum (in (CD<sub>3</sub>)<sub>2</sub>CO, 300 MHz) of bimetallic compound 4.

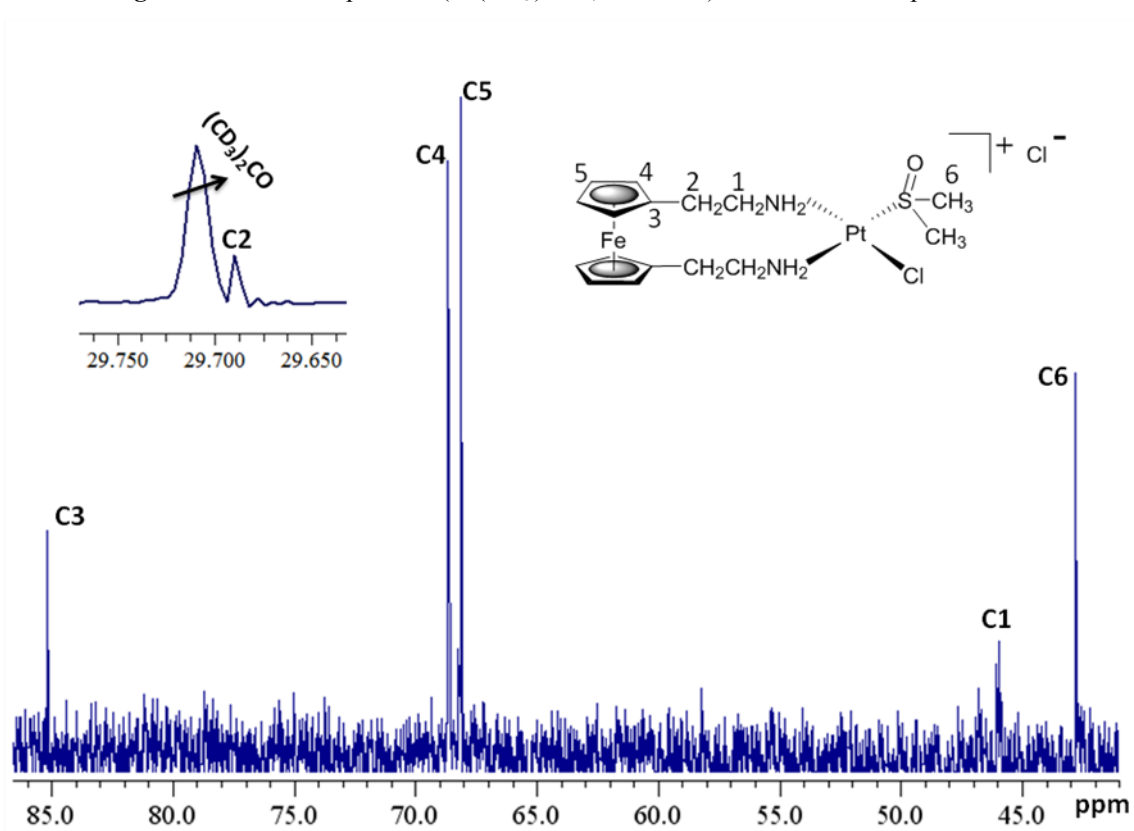

Figure S10. <sup>13</sup>C NMR spectrum (in (CD<sub>3</sub>)<sub>2</sub>CO, 75 MHz) of bimetallic compound 4. (inset: expanded view of C2 signal).

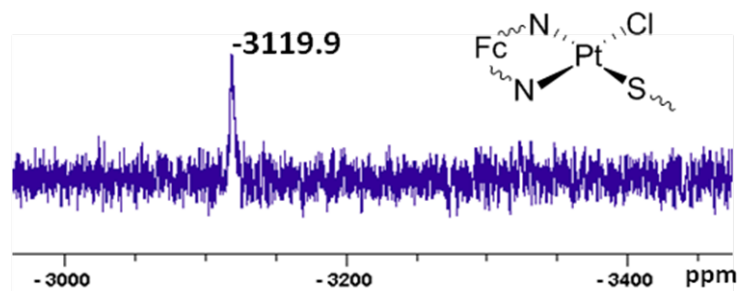

**Figure S11.**  $^{195}\text{Pt}$  NMR spectrum (in  $(\text{CD}_3)_2\text{CO}$ , 64 MHz) of compound 4.

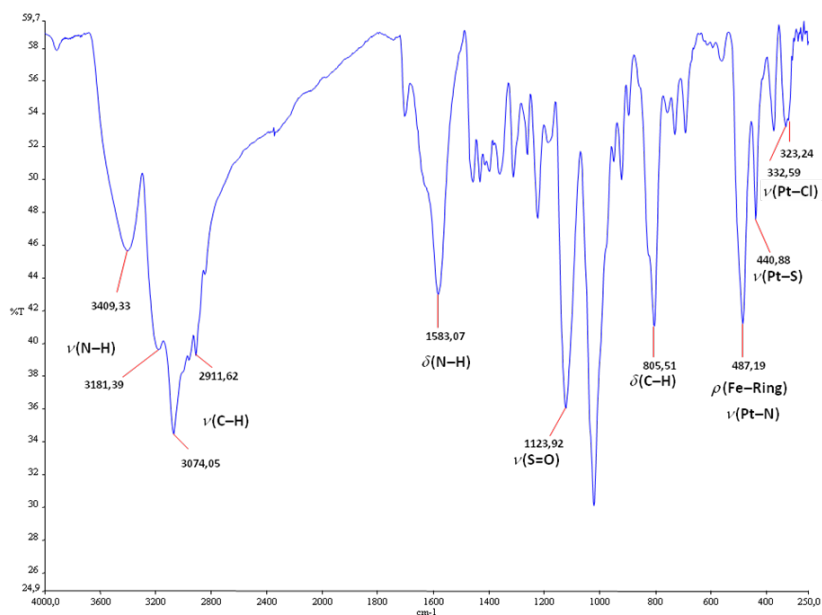

**Figure S12.** IR spectrum (in KBr) of compound 4.

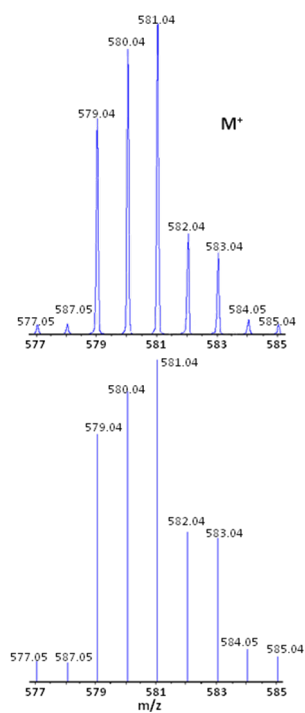

**Figure S13.** Mass spectrometry characterization by ESI for compound 4. Isotopic distribution of molecular ion pick of 4, experimental (top) and calculated (bottom).



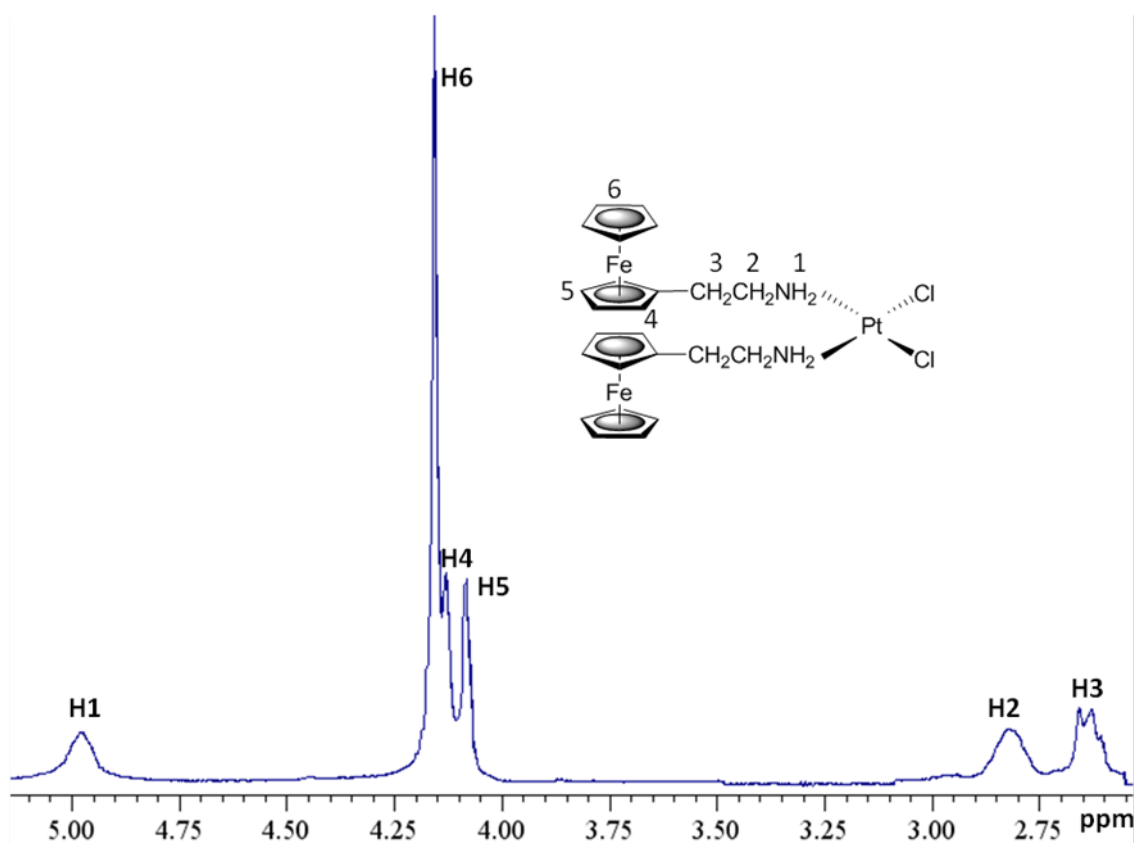

Figure S14.  $^1\text{H}$  NMR spectrum (in  $\text{dms0-d}_6$ , 300 MHz) of trimetallic compound **5**.

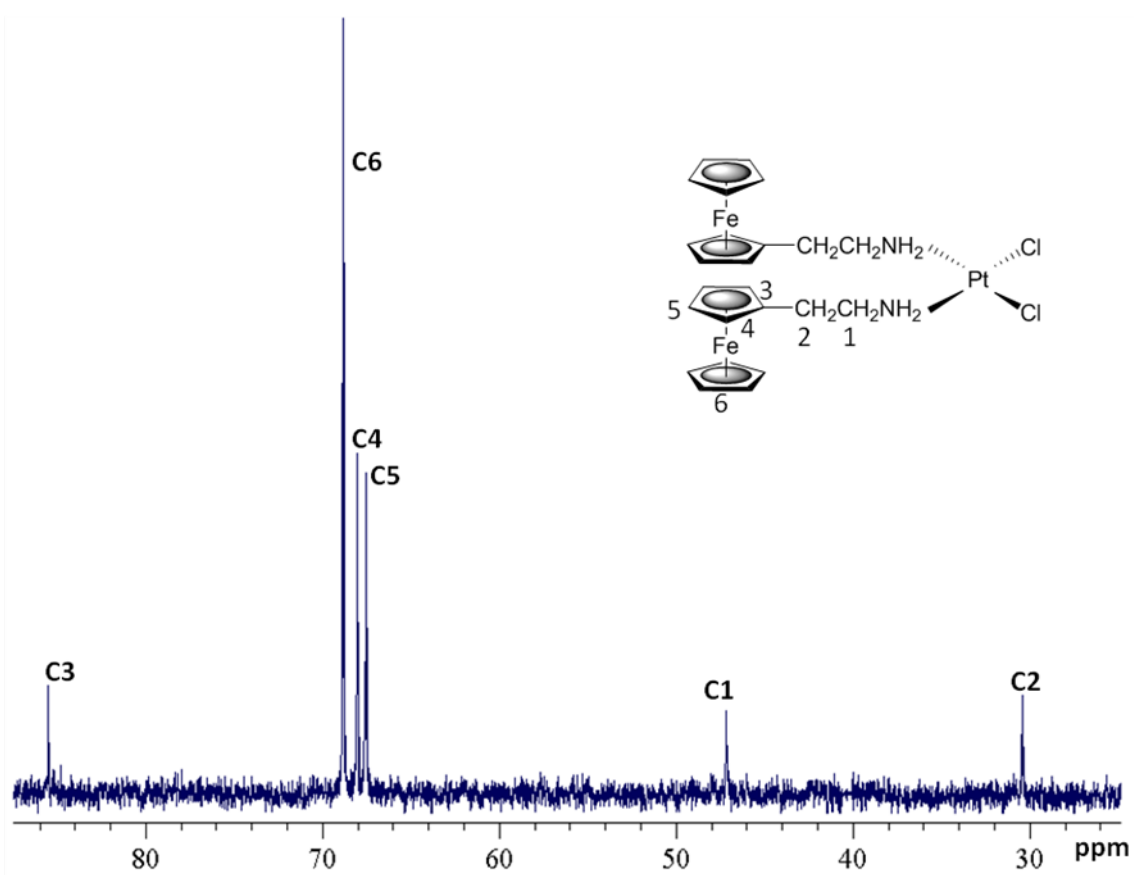

Figure S15.  $^{13}\text{C}$  NMR spectrum (in  $\text{dms0-d}_6$ , 75 MHz) of trimetallic compound **5**.

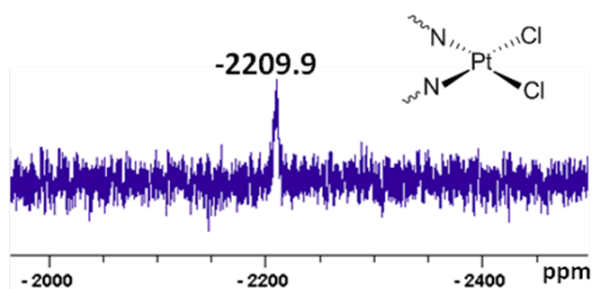

Figure S16.  $^{195}\text{Pt}$  NMR spectrum (in  $\text{dms}\text{-d}_6$ , 64 MHz) of compound 5.

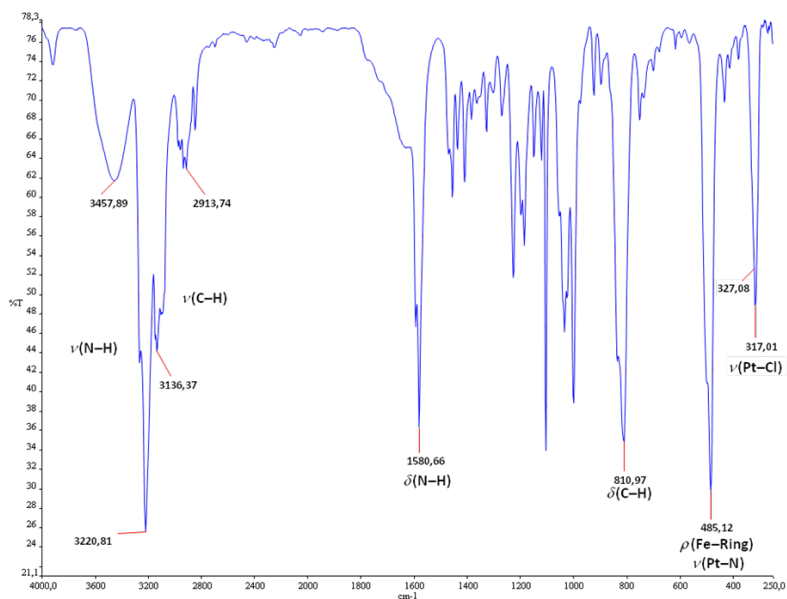

Figure S17. IR spectrum (in KBr) of compound 5.

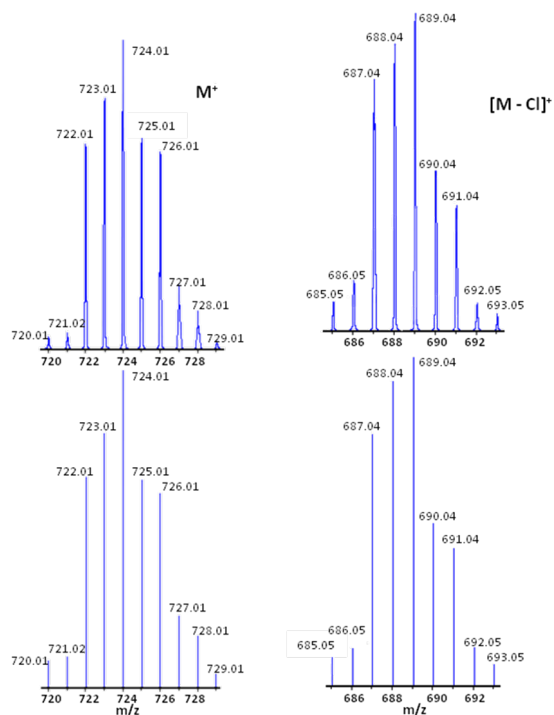

Figure S18. Mass spectrometry characterization by ESI for compound 5. Isotopic distribution of selected picks of 5, experimental (top) and calculated (bottom).

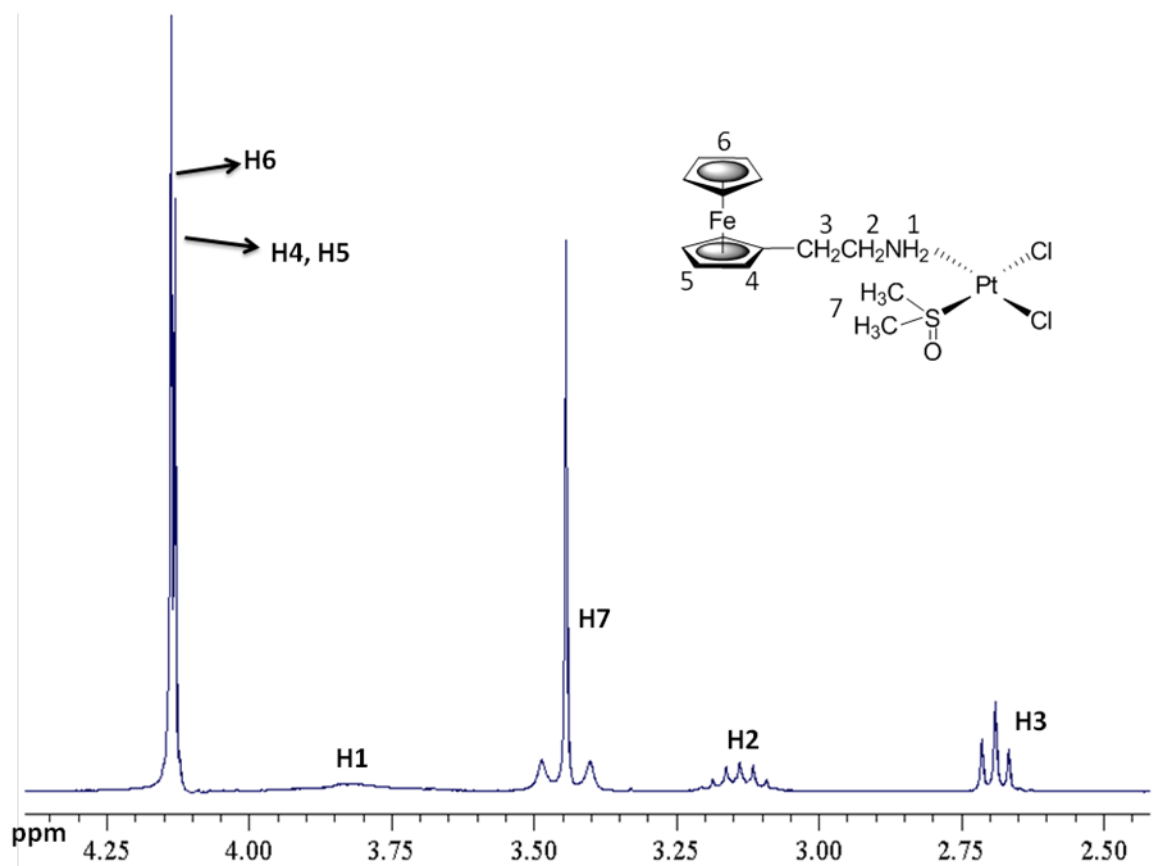

Figure S19. <sup>1</sup>H NMR spectrum (in CD<sub>2</sub>Cl<sub>2</sub>, 300 MHz) of bimetallic compound 6.

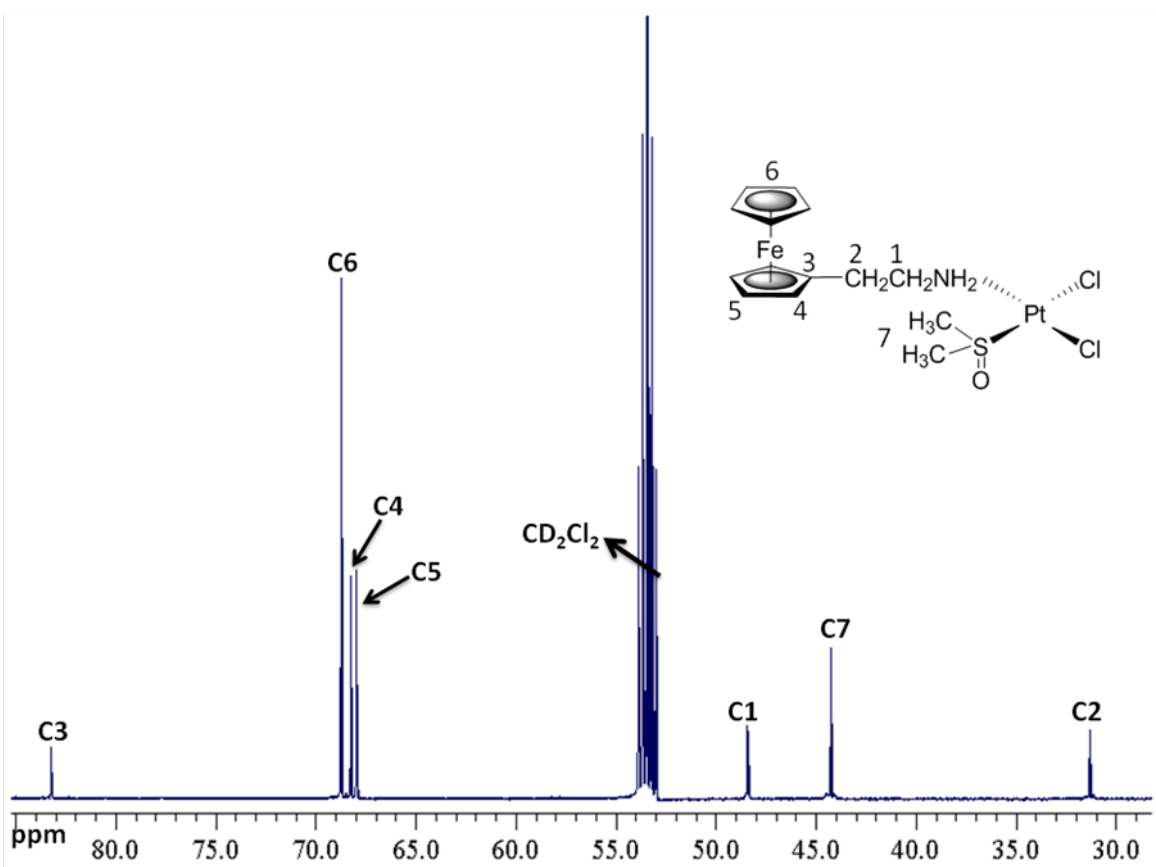

Figure S20. <sup>13</sup>C NMR spectrum (in CD<sub>2</sub>Cl<sub>2</sub>, 125 MHz) of bimetallic compound 6.

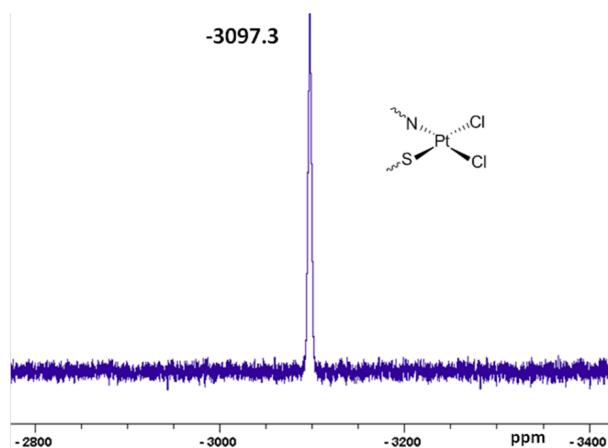

Figure S21.  $^{195}\text{Pt}$  NMR spectrum (in  $\text{CD}_2\text{Cl}_2$ , 107 MHz) of compound **6**.

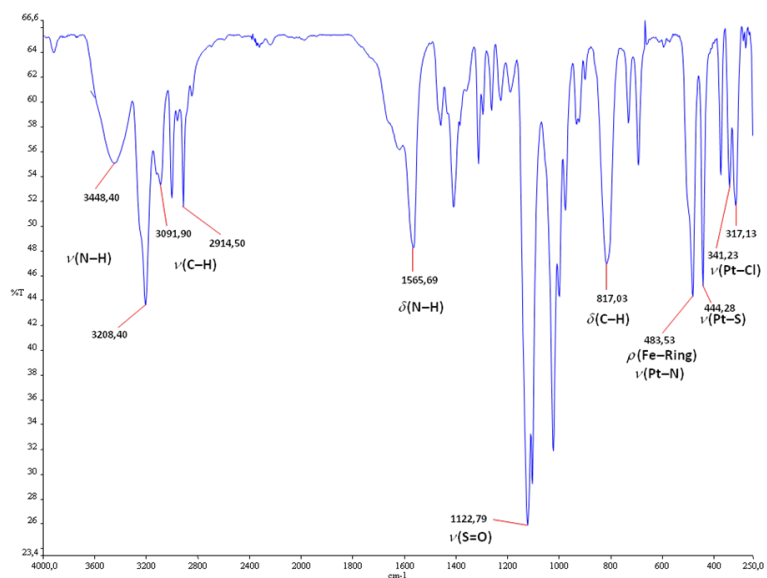

Figure S22. IR spectrum (in KBr) of compound **6**.

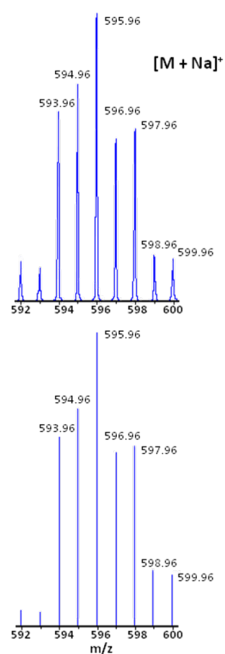

Figure S23. Mass spectrometry characterization by ESI for compound **6**. Isotopic distribution of molecular ion pick of **6**, experimental (top) and calculated (bottom).

### 3.- Electrochemistry of Compounds 3-6

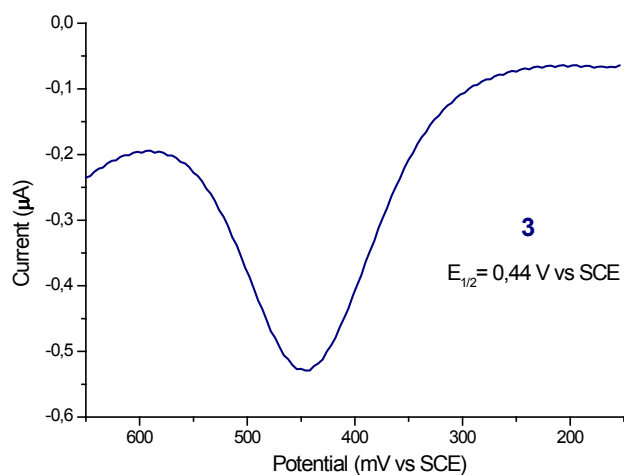

Figure S24. SWV response of compound 3 ( $5 \times 10^{-4}$  M) recorded in dmso containing 0.1 M TBAPF<sub>6</sub>.

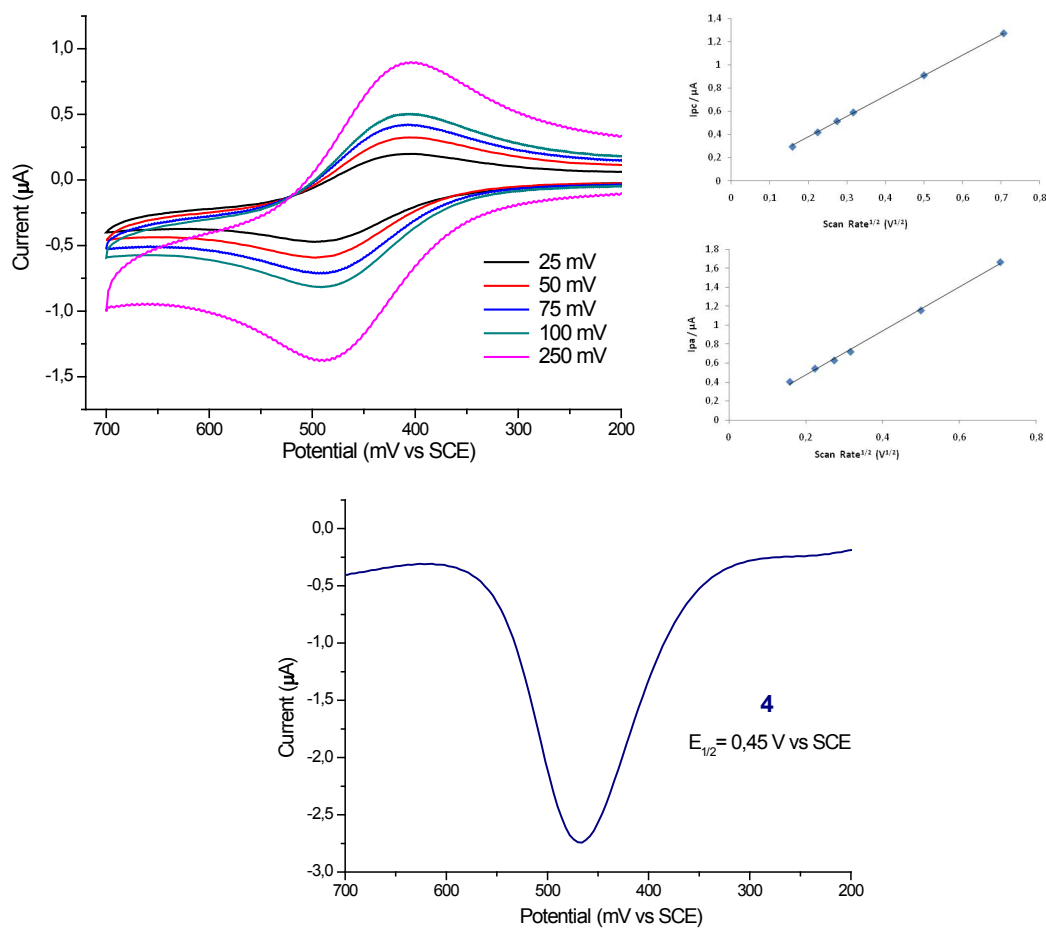

Figure S25. CV responses of compound 4 ( $5 \times 10^{-4}$  M) recorded in dmso containing 0.1 M TBAPF<sub>6</sub>, at different scan rates and plots of  $I_{pa}$  and  $I_{pc}$  against scan rate<sup>1/2</sup> (top). SWV of compound 4 (bottom).

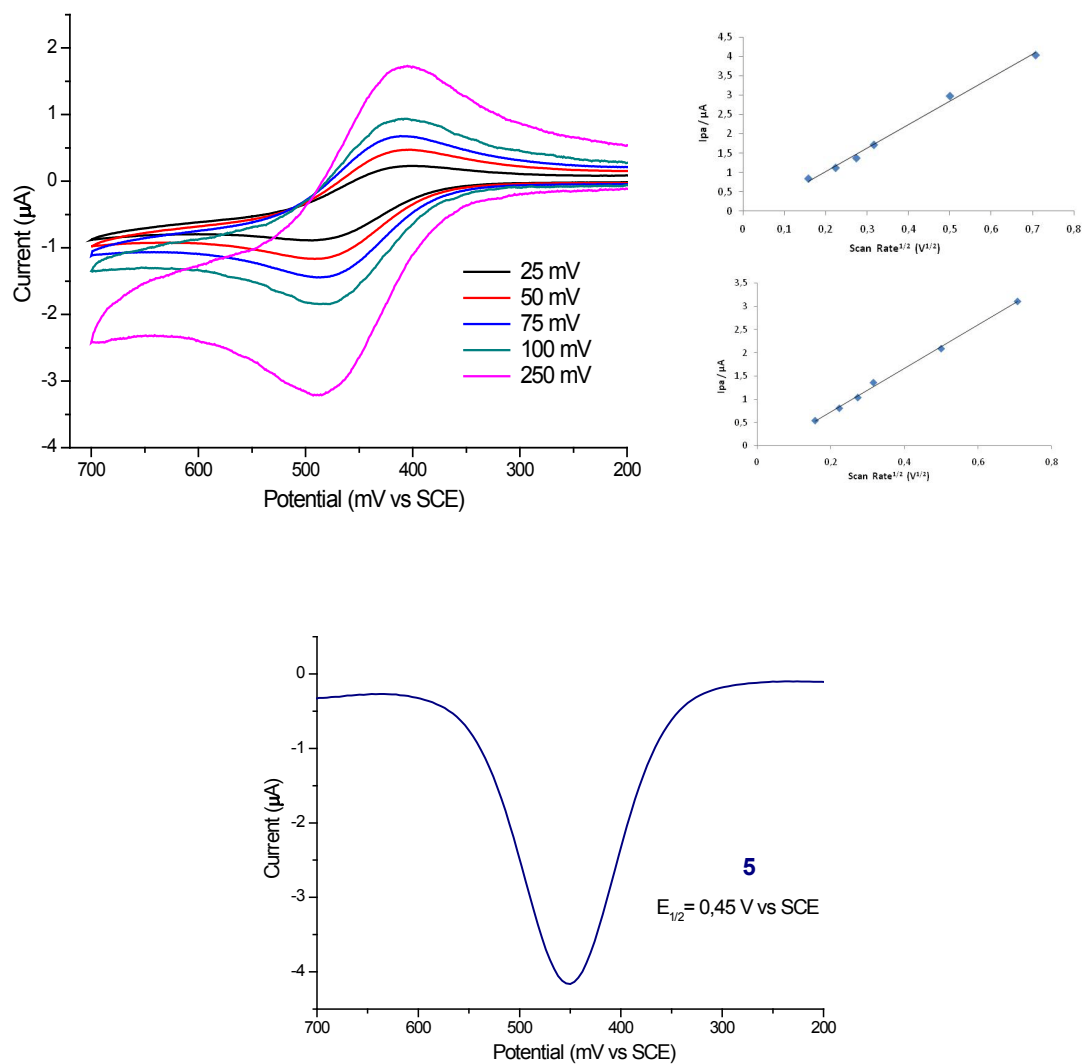

**Figure S26.** CV responses of trimetallic **5** ( $5 \times 10^{-4} \text{ M}$ ) recorded in dmsO containing 0.1 M TBAPF<sub>6</sub>, at different scan rates and plots of  $I_{pa}$  and  $I_{pc}$  against scan rate<sup>1/2</sup> (top). SWV of compound **5** (bottom).

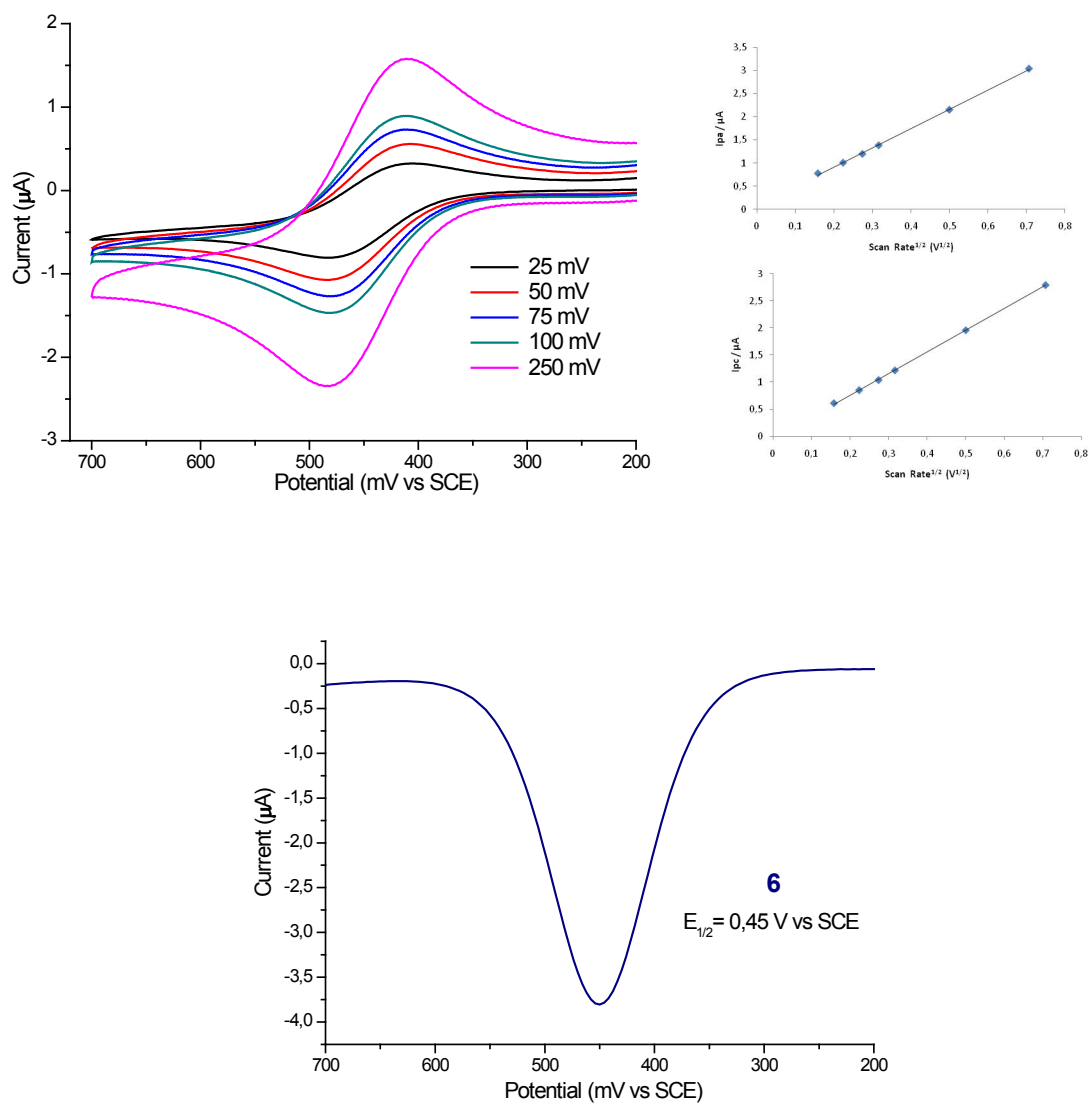

**Figure S27.** CV responses of compound **6** ( $5 \times 10^{-4} \text{ M}$ ) recorded in dmsO containing 0.1 M TBAPF<sub>6</sub>, at different scan rates and plots of  $I_{pa}$  and  $I_{pc}$  against scan rate<sup>1/2</sup> (top). SWV of compound **6** (bottom).

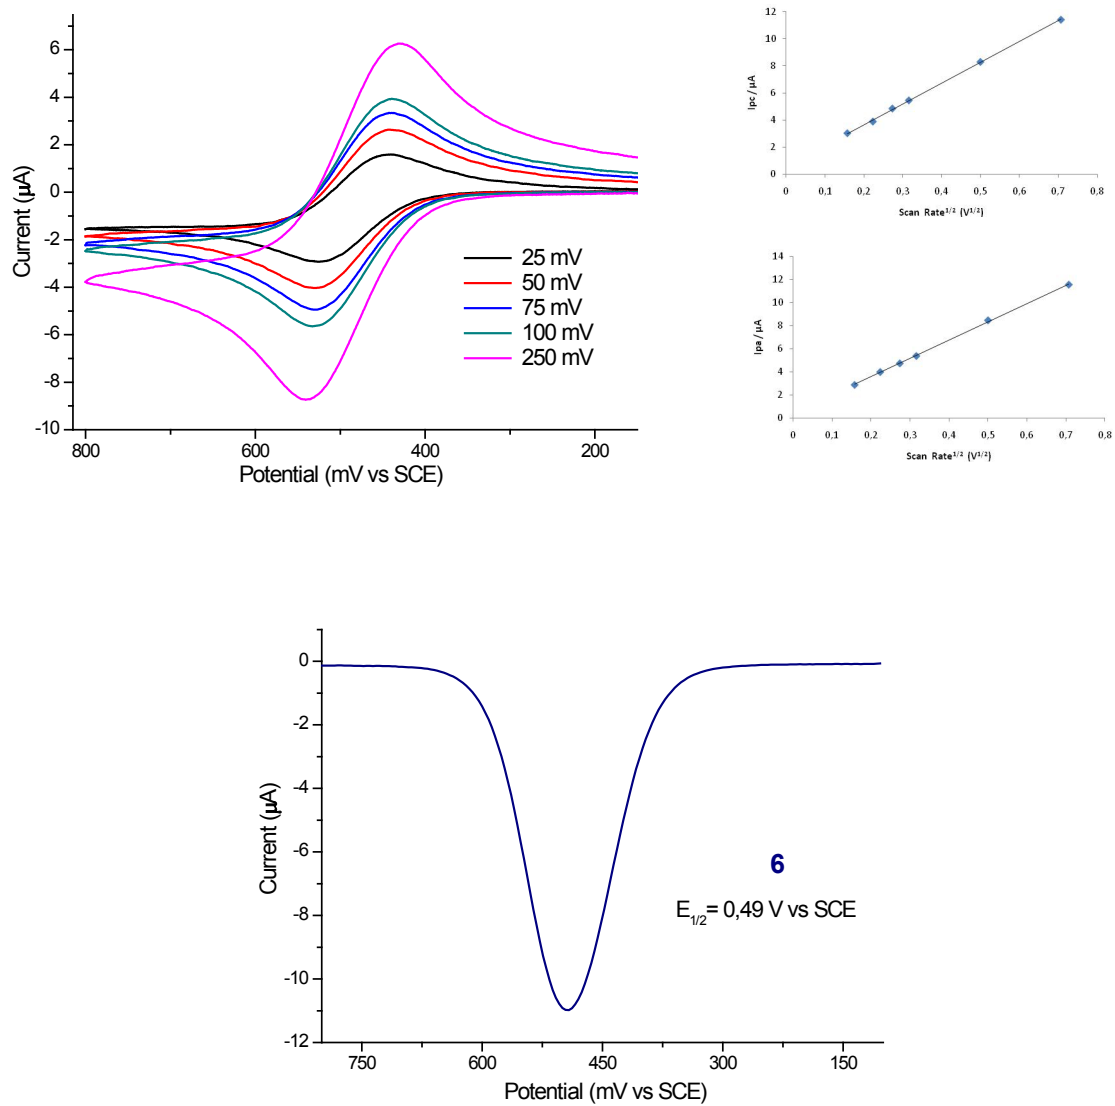

**Figure S28.** CV responses of compound **6** ( $10^{-3}$  M) recorded in  $\text{CH}_2\text{Cl}_2$  containing 0.1 M  $\text{TBAPF}_6$ , at different scan rates and plots of  $I_{pa}$  and  $I_{pc}$  against scan rate<sup>1/2</sup> (top). SWV of compound **6** (bottom).
